# Supplementary material for: Construction of Cd(ii) coordination polymers based on R-isophthalate (R = –CH3 or –OCH3) and flexible N-donor co-ligands: Syntheses, structures and photoluminescence
Source: Royal Society of Chemistry journal article supplement (doi:10.1039/c2ce06511h), 2012-01-01
Supplement: c2ce06511h.pdf [file c2ce06511h.pdf]

## Electronic Supplementary Information for

# Construction of Cd(II) Coordination Polymers Based on R-isophthalate (R = -CH<sub>3</sub> or -OCH<sub>3</sub>) and Flexible N-donor Co-ligands: Syntheses, Structures, and Photoluminescence

Min-Le Han, Jian-Ge Wang, Lu-Fang Ma,<sup>\*</sup> Hui Guo and Li-Ya Wang,<sup>\*</sup>

College of Chemistry and Chemical Engineering, Luoyang Normal University, Luoyang 471022,  
China

To whom correspondence should be addressed.

E-mail address: [mazhuxp@126.com](mailto:mazhuxp@126.com) (L. F. Ma), [wlya@lynu.edu.cn](mailto:wlya@lynu.edu.cn) (L. Y. Wang) Tel./Fax:

+86-379-65511205

**Table S1.** Selected Bond Lengths (Å) and Angles (°) for **1–6<sup>a</sup>**.

| <b>1</b>            |            |                     |            |
|---------------------|------------|---------------------|------------|
| Cd(1)-O(1)          | 2.2298(14) | Cd(1)-N(1)          | 2.3400(18) |
| Cd(1)-N(12)#1       | 2.2964(18) | Cd(1)-O(6)          | 2.3574(16) |
| Cd(1)-O(11)         | 2.3299(16) | Cd(1)-O(7)          | 2.4706(14) |
| Cd(2)-O(12)         | 2.3032(15) | Cd(2)-O(4)#3        | 2.3562(15) |
| Cd(2)-O(9)          | 2.3137(14) | Cd(2)-O(3)#3        | 2.4664(14) |
| Cd(2)-N(7)          | 2.3213(17) | Cd(2)-N(6)#2        | 2.3268(17) |
| O(9)-Cd(2)-O(3)#3   | 140.62(5)  | N(12)#1-Cd(1)-N(1)  | 95.66(6)   |
| O(1)-Cd(1)-N(12)#1  | 137.99(6)  | O(11)-Cd(1)-N(1)    | 169.06(5)  |
| O(1)-Cd(1)-O(11)    | 81.30(6)   | O(1)-Cd(1)-O(6)     | 86.00(5)   |
| N(12)#1-Cd(1)-O(11) | 91.98(6)   | N(12)#1-Cd(1)-O(6)  | 135.45(6)  |
| O(1)-Cd(1)-N(1)     | 87.79(6)   | O(11)-Cd(1)-O(7)    | 89.23(5)   |
| O(11)-Cd(1)-O(6)    | 87.97(6)   | N(1)-Cd(1)-O(7)     | 99.61(6)   |
| N(1)-Cd(1)-O(6)     | 92.04(6)   | O(6)-Cd(1)-O(7)     | 53.85(5)   |
| O(1)-Cd(1)-O(7)     | 139.14(6)  | N(12)#1-Cd(1)-O(7)  | 81.60(6)   |
| O(12)-Cd(2)-O(9)    | 81.10(5)   | O(4)#3-Cd(2)-O(3)#3 | 54.06(5)   |
| O(12)-Cd(2)-N(7)    | 170.91(6)  | N(7)-Cd(2)-O(3)#3   | 91.34(5)   |
| O(9)-Cd(2)-N(7)     | 90.95(6)   | N(6)#2-Cd(2)-O(3)#3 | 82.79(5)   |

|                     |            |                     |            |
|---------------------|------------|---------------------|------------|
| O(12)-Cd(2)-N(6)#2  | 92.53(6)   | O(9)-Cd(2)-O(4)#3   | 86.82(5)   |
| O(9)-Cd(2)-N(6)#2   | 135.91(6)  | N(7)-Cd(2)-O(4)#3   | 87.14(6)   |
| N(7)-Cd(2)-N(6)#2   | 96.26(6)   | N(6)#2-Cd(2)-O(4)#3 | 136.82(5)  |
| O(12)-Cd(2)-O(4)#3  | 88.02(6)   | O(12)-Cd(2)-O(3)#3  | 92.04(5)   |
| <b>2</b>            |            |                     |            |
| Cd(1)-N(1)          | 2.248(2)   | Cd(1)-O(4)#1        | 2.249(2)   |
| Cd(1)-O(1)#2        | 2.2958(19) | Cd(1)-N(4)#3        | 2.355(2)   |
| Cd(1)-O(2)          | 2.449(2)   |                     |            |
| N(4)#3-Cd(1)-O(2)   | 171.64(8)  | N(1)-Cd(1)-O(1)#2   | 129.77(8)  |
| N(1)-Cd(1)-O(3)#1   | 85.37(7)   | O(1)#2-Cd(1)-O(3)#1 | 144.42(7)  |
| N(4)#3-Cd(1)-O(3)#1 | 94.97(8)   | N(1)-Cd(1)-N(4)#3   | 91.00(9)   |
| O(3)#1-Cd(1)-O(2)   | 93.37(6)   | O(1)#2-Cd(1)-N(4)#3 | 80.96(8)   |
| N(1)-Cd(1)-O(2)     | 89.55(8)   | O(1)#2-Cd(1)-O(2)   | 92.29(7)   |
| <b>3</b>            |            |                     |            |
| Cd(1)-O(4)#1        | 2.240(3)   | Cd(1)-N(1)          | 2.271(3)   |
| Cd(1)-O(1)          | 2.289(3)   | Cd(1)-O(6)          | 2.336(3)   |
| Cd(1)-O(3)#2        | 2.402(3)   | Cd(1)-O(2)          | 2.573(3)   |
| O(4)#1-Cd(1)-N(1)   | 128.81(12) | O(4)#1-Cd(1)-O(1)   | 93.79(10)  |
| N(1)-Cd(1)-O(1)     | 137.07(11) | O(4)#1-Cd(1)-O(6)   | 82.72(12)  |
| N(1)-Cd(1)-O(6)     | 88.49(13)  | O(1)-Cd(1)-O(6)     | 92.60(13)  |
| O(4)#1-Cd(1)-O(3)#2 | 97.06(11)  | N(1)-Cd(1)-O(3)#2   | 89.47(11)  |
| O(1)-Cd(1)-O(3)#2   | 90.23(11)  | O(6)-Cd(1)-O(3)#2   | 177.17(11) |
| O(4)#1-Cd(1)-O(2)   | 141.95(10) | N(1)-Cd(1)-O(2)     | 84.60(11)  |
| O(1)-Cd(1)-O(2)     | 53.48(9)   | O(6)-Cd(1)-O(2)     | 80.40(11)  |
| O(3)#2-Cd(1)-O(2)   | 101.36(10) |                     |            |
| <b>4</b>            |            |                     |            |
| Cd(1)-O(1)          | 2.233(2)   | Cd(1)-N(6)#1        | 2.304(3)   |
| Cd(1)-O(5)          | 2.326(2)   | Cd(1)-N(1)          | 2.335(3)   |
| Cd(1)-O(4)#2        | 2.370(2)   | Cd(1)-O(3)#2        | 2.471(2)   |
| O(1)-Cd(1)-N(6)#1   | 135.27(10) | O(1)-Cd(1)-O(5)     | 81.08(9)   |
| N(6)#1-Cd(1)-O(5)   | 93.46(9)   | O(1)-Cd(1)-N(1)     | 88.03(9)   |
| N(6)#1-Cd(1)-N(1)   | 97.75(9)   | O(5)-Cd(1)-N(1)     | 168.05(8)  |
| O(1)-Cd(1)-O(4)#2   | 89.87(9)   | N(6)#1-Cd(1)-O(4)#2 | 134.39(8)  |
| O(5)-Cd(1)-O(4)#2   | 86.76(9)   | N(1)-Cd(1)-O(4)#2   | 88.32(9)   |
| O(1)-Cd(1)-O(3)#2   | 143.47(9)  | N(6)#1-Cd(1)-O(3)#2 | 80.75(9)   |
| O(5)-Cd(1)-O(3)#2   | 92.62(8)   | N(1)-Cd(1)-O(3)#2   | 93.24(8)   |
| O(4)#2-Cd(1)-O(3)#2 | 53.72(7)   |                     |            |
| <b>5</b>            |            |                     |            |
| Cd(1)-O(4)#1        | 2.2859(18) | Cd(1)-N(1)          | 2.297(2)   |
| Cd(1)-N(4)          | 2.310(2)   | Cd(1)-O(5)          | 2.324(2)   |
| Cd(1)-O(1)          | 2.3468(17) | Cd(1)-O(2)          | 2.5062(17) |
| O(1)-Cd(1)-O(2)     | 53.61(6)   | O(4)#1-Cd(1)-N(1)   | 92.95(8)   |
| O(4)#1-Cd(1)-N(4)   | 97.49(8)   | N(1)-Cd(1)-N(4)     | 169.49(8)  |
| O(4)#1-Cd(1)-O(5)   | 128.41(7)  | N(1)-Cd(1)-O(5)     | 85.76(9)   |

|                     |            |                     |            |
|---------------------|------------|---------------------|------------|
| N(4)-Cd(1)-O(5)     | 86.82(9)   | O(4)#1-Cd(1)-O(1)   | 83.67(6)   |
| N(1)-Cd(1)-O(1)     | 92.77(8)   | N(4)-Cd(1)-O(1)     | 89.57(8)   |
| O(5)-Cd(1)-O(1)     | 147.92(7)  | O(4)#1-Cd(1)-O(2)   | 137.14(6)  |
| N(1)-Cd(1)-O(2)     | 86.58(8)   | N(4)-Cd(1)-O(2)     | 86.57(8)   |
| O(5)-Cd(1)-O(2)     | 94.33(7)   |                     |            |
| <b>6</b>            |            |                     |            |
| Cd(1)-O(2)#1        | 2.2315(15) | Cd(1)-N(1)          | 2.2835(8)  |
| Cd(1)-O(5)          | 2.3006(8)  | Cd(1)-O(3)#2        | 2.3637(16) |
| Cd(1)-O(4)#2        | 2.4321(16) | Cd(1)-O(1)          | 2.4363(17) |
| O(2)#1-Cd(1)-N(1)   | 127.66(4)  | O(2)#1-Cd(1)-O(5)   | 83.80(5)   |
| N(1)-Cd(1)-O(5)     | 87.17(3)   | O(2)#1-Cd(1)-O(3)#2 | 91.31(6)   |
| N(1)-Cd(1)-O(3)#2   | 141.00(4)  | O(5)-Cd(1)-O(3)#2   | 96.85(5)   |
| O(2)#1-Cd(1)-O(4)#2 | 143.47(6)  | N(1)-Cd(1)-O(4)#2   | 87.10(4)   |
| O(5)-Cd(1)-O(4)#2   | 87.65(5)   | O(3)#2-Cd(1)-O(4)#2 | 54.53(5)   |
| O(2)#1-Cd(1)-O(1)   | 93.10(6)   | N(1)-Cd(1)-O(1)     | 89.06(4)   |
| O(5)-Cd(1)-O(1)     | 172.16(4)  | O(3)#2-Cd(1)-O(1)   | 90.40(6)   |
| O(4)#2-Cd(1)-O(1)   | 99.02(6)   |                     |            |

<sup>a</sup> Symmetry codes: **1**: #1  $x, y - 1, z$ ; #2  $x, y, z + 1$ ; #3:  $x, y + 1, z + 1$ ; **2**: #1:  $-x + 2, -y + 2, -z + 2$ ; #2:  $-x + 2, -y + 1, -z + 2$ ; #3:  $x, y, z + 1$ ; **3**: #1:  $x - 1, y + 1, z$ ; #2:  $-x + 1, -y, -z$ ; **4**: #1:  $x, y, z + 1$ ; #2:  $x + 1, y, z$ ; **5**: #1:  $x + 1, y, z$ ; **6**: #1:  $-x + 1, -y, -z$ ; #2:  $-x, -y + 1, -z$ .

**Table S2.** Distance (Å) and angles (°) of hydrogen bonding for **1–6<sup>a</sup>**.

| D-H...A                 | d(D-H) | d(H...A) | d(D...A) | ∠ (DHA) |
|-------------------------|--------|----------|----------|---------|
| <b>1</b>                |        |          |          |         |
| O(19)-H(18W)···O(10)#7  | 0.84   | 2.09     | 2.918(3) | 169.7   |
| O(19)-H(17W)···O(8)     | 0.83   | 2.03     | 2.794(3) | 151.7   |
| O(14)-H(8W)···O(8)#8    | 0.83   | 2.09     | 2.875(3) | 158.4   |
| O(18)-H(16W)···O(15)    | 0.86   | 1.99     | 2.758(4) | 148.4   |
| O(18)-H(15W)···O(19)#8  | 0.83   | 1.92     | 2.742(4) | 171.1   |
| O(15)-H(9W)···O(17)#8   | 0.83   | 1.91     | 2.734(3) | 177.0   |
| O(15)-H(10W)···O(13)#9  | 0.83   | 2.15     | 2.801(3) | 134.8   |
| O(17)-H(14W)···O(5)#8   | 0.84   | 2.57     | 3.309(3) | 148.4   |
| O(17)-H(13W)···N(5)#2   | 0.83   | 2.23     | 3.025(3) | 159.4   |
| O(16)-H(11W)···O(18)#10 | 0.85   | 1.91     | 2.758(4) | 179.4   |
| O(13)-H(5W)···O(16)     | 0.83   | 2.10     | 2.885(3) | 157.0   |
| O(13)-H(6W)···O(2)#6    | 0.83   | 1.91     | 2.722(3) | 166.1   |
| O(12)-H(4W)···O(3)#8    | 0.83   | 1.86     | 2.685(2) | 172.9   |
| O(12)-H(3W)···O(13)#7   | 0.83   | 2.00     | 2.809(2) | 162.6   |
| O(11)-H(2W)···O(14)     | 0.83   | 1.92     | 2.749(2) | 173.8   |
| O(11)-H(1W)···O(7)#8    | 0.84   | 1.90     | 2.722(2) | 168.3   |
| <b>2</b>                |        |          |          |         |

|                   |      |      |            |       |
|-------------------|------|------|------------|-------|
| O(6)-H(1W)⋯O(4)#5 | 0.83 | 2.21 | 2.972(7)   | 153.0 |
| O(6)-H(2W)⋯O(1)   | 0.84 | 2.42 | 2.902(5)   | 117.5 |
| <b>3</b>          |      |      |            |       |
| O(7)-H(4W)⋯O(8)#5 | 0.85 | 1.90 | 2.747(13)  | 173.5 |
| O(7)-H(3W)⋯O(1)#6 | 0.85 | 1.95 | 2.803(7)   | 176.5 |
| O(6)-H(2W)⋯O(7)#7 | 0.84 | 1.85 | 2.684(7)   | 176.1 |
| O(6)-H(1W)⋯O(2)#8 | 0.83 | 1.97 | 2.749(4)   | 157.0 |
| O(8)-H(5W)⋯N(3)   | 0.81 | 2.22 | 2.867(12)  | 137.9 |
| O(8)-H(6W)⋯N(3)#9 | 0.84 | 2.26 | 3.027(12)  | 150.9 |
| <b>4</b>          |      |      |            |       |
| O(6)-H(4W)⋯O(2)#5 | 0.84 | 1.88 | 2.716(5)   | 175.7 |
| O(5)-H(2W)⋯O(6)#6 | 0.84 | 2.12 | 2.853(4)   | 146.0 |
| O(5)-H(1W)⋯O(3)#7 | 0.83 | 1.89 | 2.694(3)   | 162.6 |
| <b>5</b>          |      |      |            |       |
| O(6)-H(4W)⋯O(3)#5 | 0.85 | 2.36 | 2.910(3)   | 123.4 |
| O(6)-H(3W)⋯O(3)#6 | 0.84 | 1.97 | 2.804(3)   | 173.6 |
| O(5)-H(2W)⋯O(2)#7 | 0.83 | 1.87 | 2.682(3)   | 163.8 |
| O(5)-H(1W)⋯O(6)#8 | 0.82 | 2.06 | 2.881(4)   | 178.7 |
| <b>6</b>          |      |      |            |       |
| O(6)-H(4W)⋯O(1)#4 | 0.82 | 1.97 | 2.7557(17) | 159.7 |
| O(6)-H(3W)⋯O(3)#5 | 0.83 | 2.16 | 2.871(2)   | 143.7 |
| O(5)-H(2W)⋯O(4)#6 | 0.83 | 1.93 | 2.7411(18) | 165.9 |
| O(5)-H(1W)⋯O(6)#7 | 0.83 | 1.93 | 2.748      | 166.9 |

<sup>a</sup> Symmetry codes: **1**: #2:  $x, y, z + 1$ ; #6:  $x, y + 1, z$ ; #7:  $-x + 1, -y + 1, -z + 1$ ; #8:  $-x + 1, -y, -z + 1$ ; #9:  $x - 1, y - 1, z$ ; #10:  $x + 1, y + 1, z$ ; **2**: #5:  $x, y - 1, z$ ; **3**: #5:  $x + 1, y, z$ ; #6:  $x, y, z + 1$ ; #7:  $x - 1, y, z - 1$ ; #8:  $-x, -y, -z$ ; #9:  $-x - 1, -y + 1, -z + 1$ ; **4**: #5:  $-x + 1, -y + 1, -z + 2$ ; #6:  $x - 1, y, z + 1$ ; #7:  $-x, -y + 1, -z + 3$ ; **5**: #5:  $-x + 1, -y + 1, -z$ ; #6:  $x + 1, y + 1, z$ ; #7:  $-x + 1, -y, -z$ ; #8:  $-x + 2, -y + 1, -z$ ; **6**: #4:  $x, y, z + 1$ ; #5:  $-x, -y + 1, -z + 1$ ; #6:  $x + 1, y, z$ ; #7:  $x + 1, y, z - 1$ .

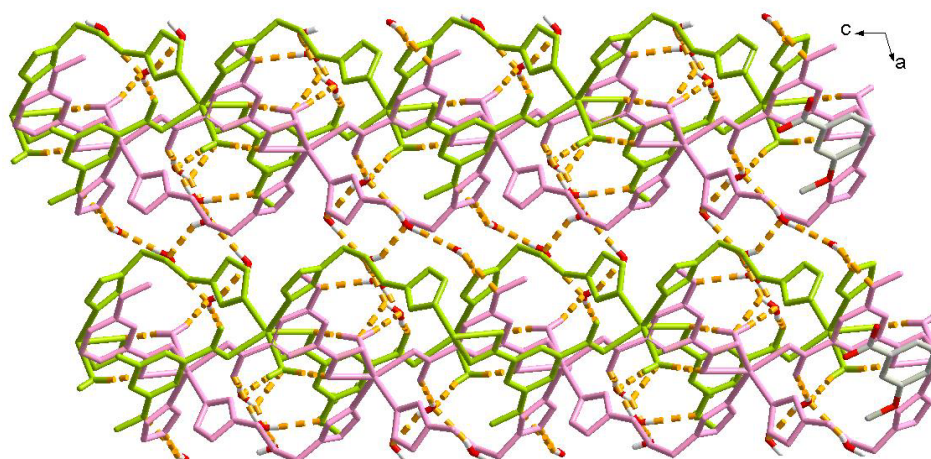

**Fig. S1** View of the 3-D supramolecular architecture of **1**. Hydrogen bonds are represented as light orange dash line.

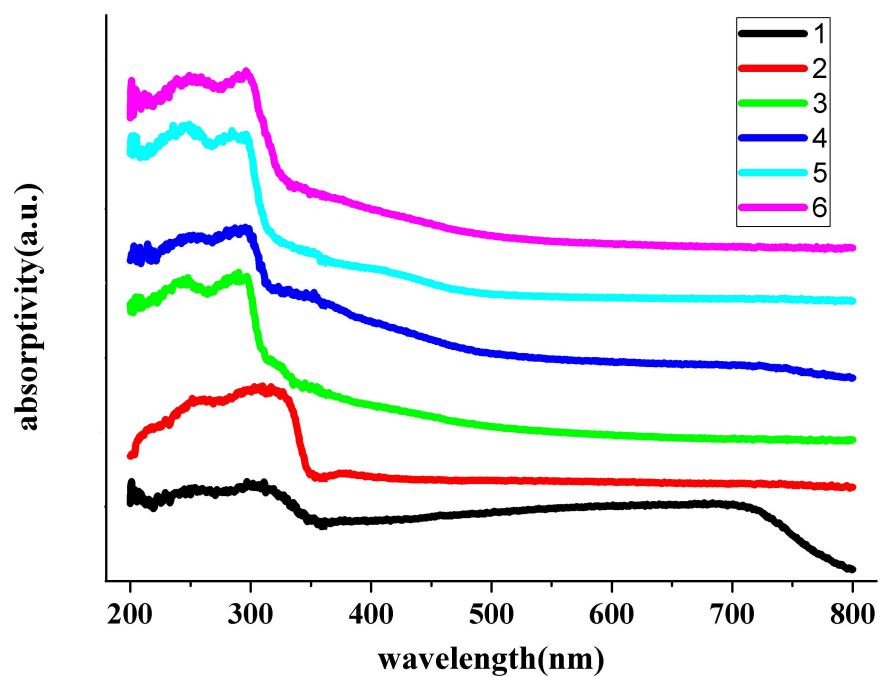

Fig. S2 The UV-vis absorption spectra for 1–6 in the solid state at room temperature.
